# Supplementary material
Source: MDPI journal article supplement (https://www.mdpi.com/2227-9040/11/10/531)
Supplement: s1 [file s1 › chemosensors-2610415-supplementary.pdf]

Supplementary

# Engineering Branched Au@Ag Nanostar Plasmonic Array for Coupling Electromagnetic Enhancement and SERS Trace Detection of Polystyrene in Aquatic Environments

Mingzhu Wu <sup>1</sup>, Jianhang Lin <sup>1</sup>, Da Zheng <sup>1</sup>, Yirui Yang <sup>1</sup>, Zhihao Li <sup>1</sup>, Zhengdong Zhu <sup>1</sup>, Yonghui Shen <sup>2</sup>, Gang Ni <sup>1</sup> and Maofeng Zhang <sup>1,\*</sup>

<sup>1</sup> School of Chemistry and Chemical Engineering, Hefei University of Technology, 193 Tunxi Road, Hefei 230009, China; 2020216141@mail.hfut.edu.cn (M.W.); 2020218390@mail.hfut.edu.cn (J.L.); 2020216156@mail.hfut.edu.cn (D.Z.); yang\_yi\_rui@mail.hfut.edu.cn (Y.Y.); 2021170553@mail.hfut.edu.cn (Z.L.); m15755629043@163.com (Z.Z.); gangni@hfut.edu.cn (G.N.)

<sup>2</sup> Anhui Aochuang Environment Testing Co. Ltd., Weisan Road, Fuyang Economic and Technological Development Zone, Fuyang 236000, China; ahac2015@163.com

\* Correspondence: mfzhang@hfut.edu.cn

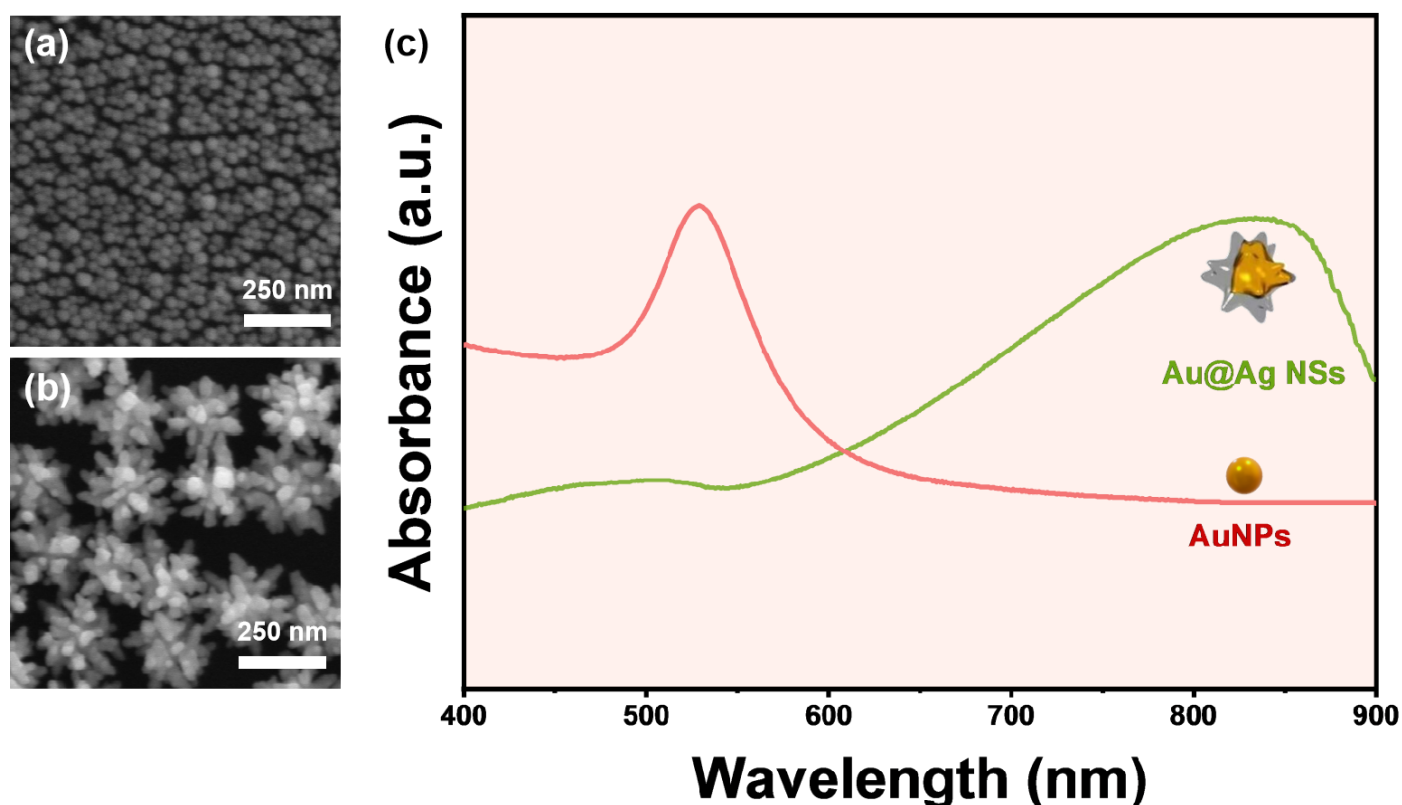

**Figure S1.** SEM images of (a) AuNPs; (b) Au@Ag NSs; (c) UV/VIS spectra of AuNPs and Au@Ag NSs.

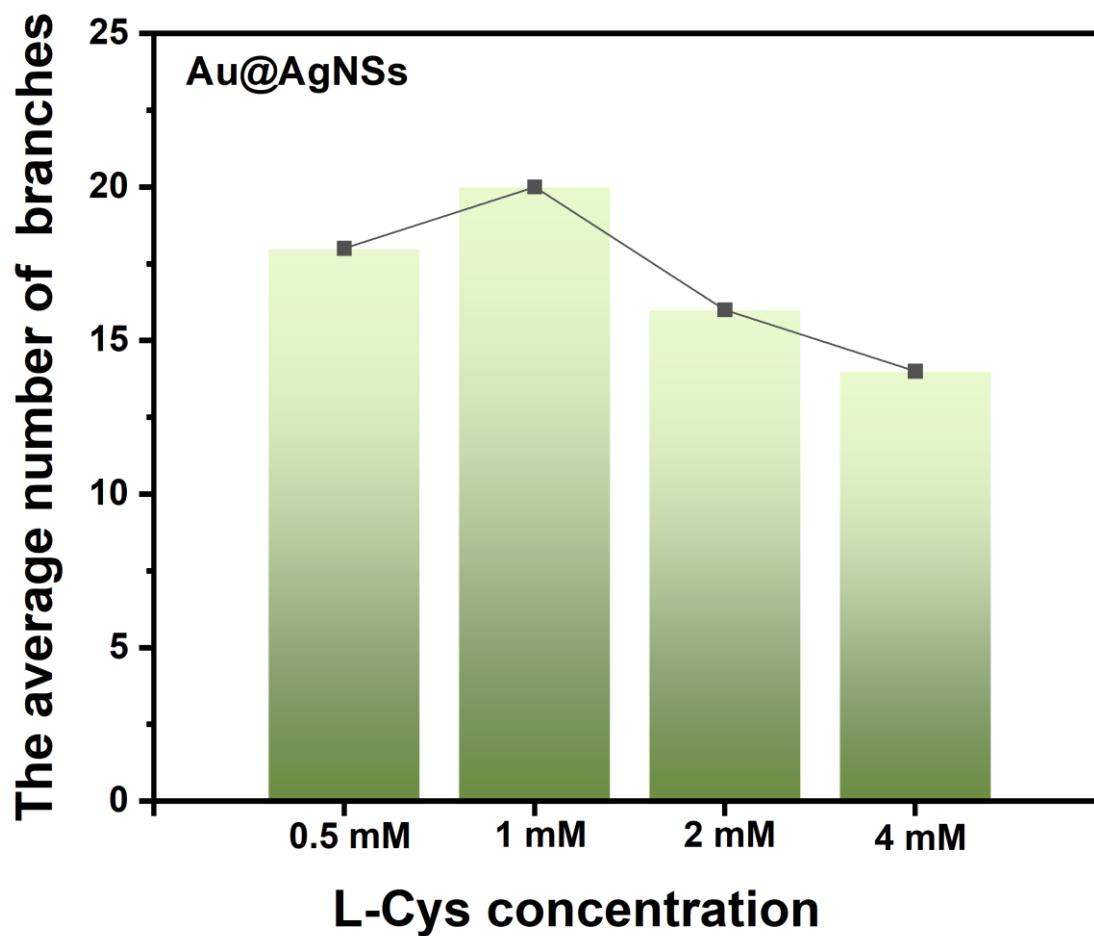

Figure S2. The plot between the average number of branches of Au@AgNSs and L-Cys concentration.

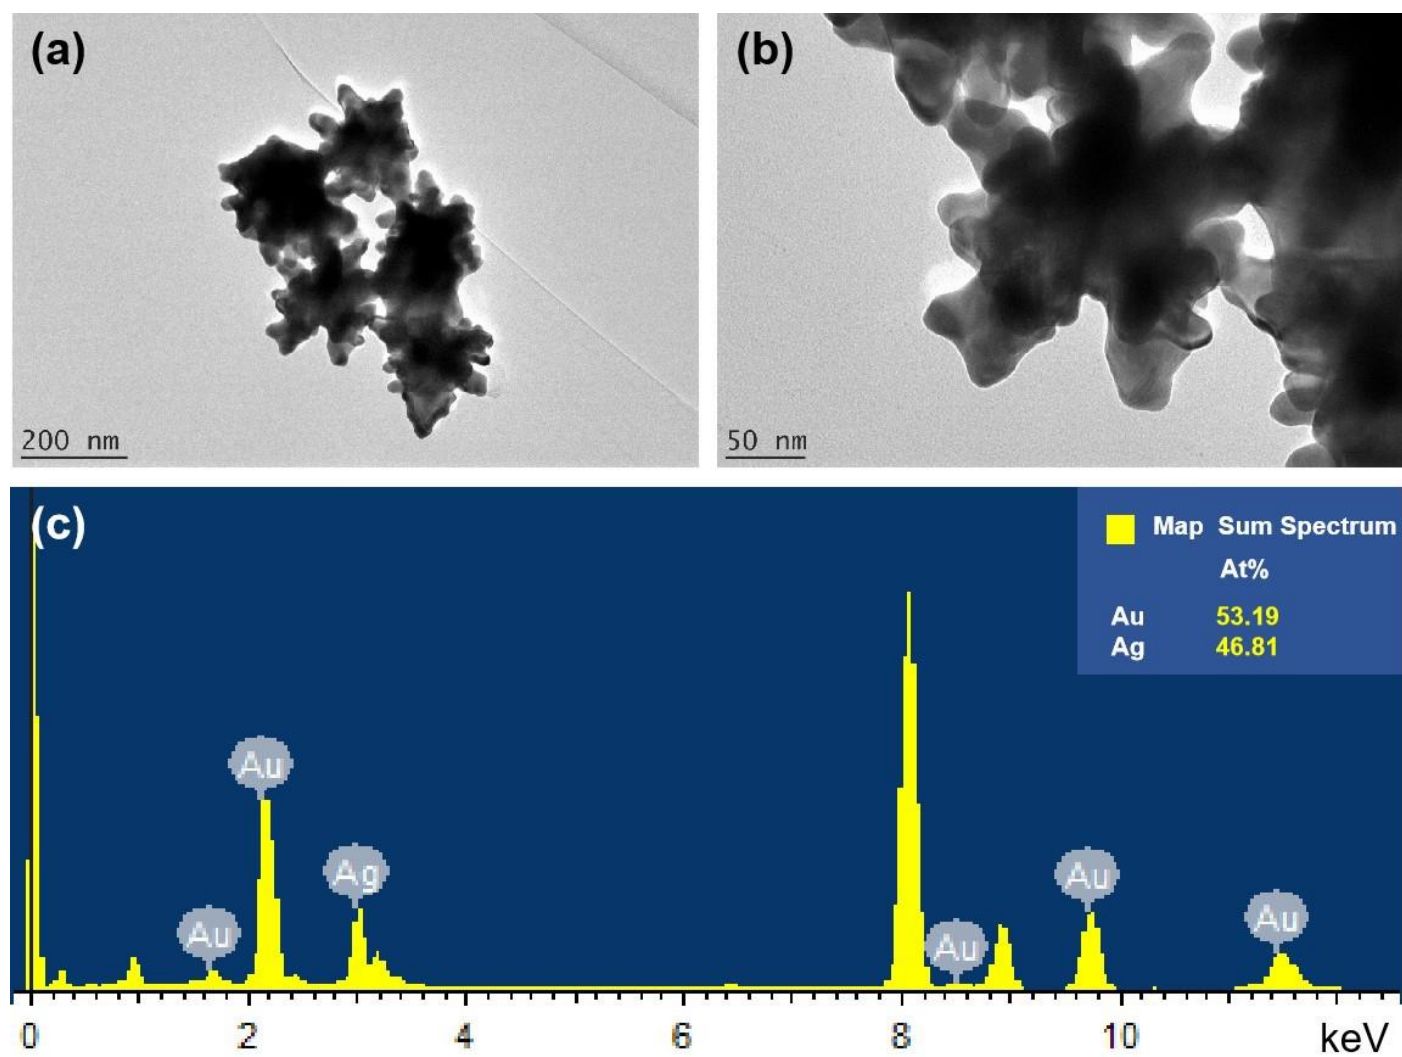

Figure S3. (a) and (b) TEM of Au@AgNSs; (c) Energy dispersive spectroscopy image.

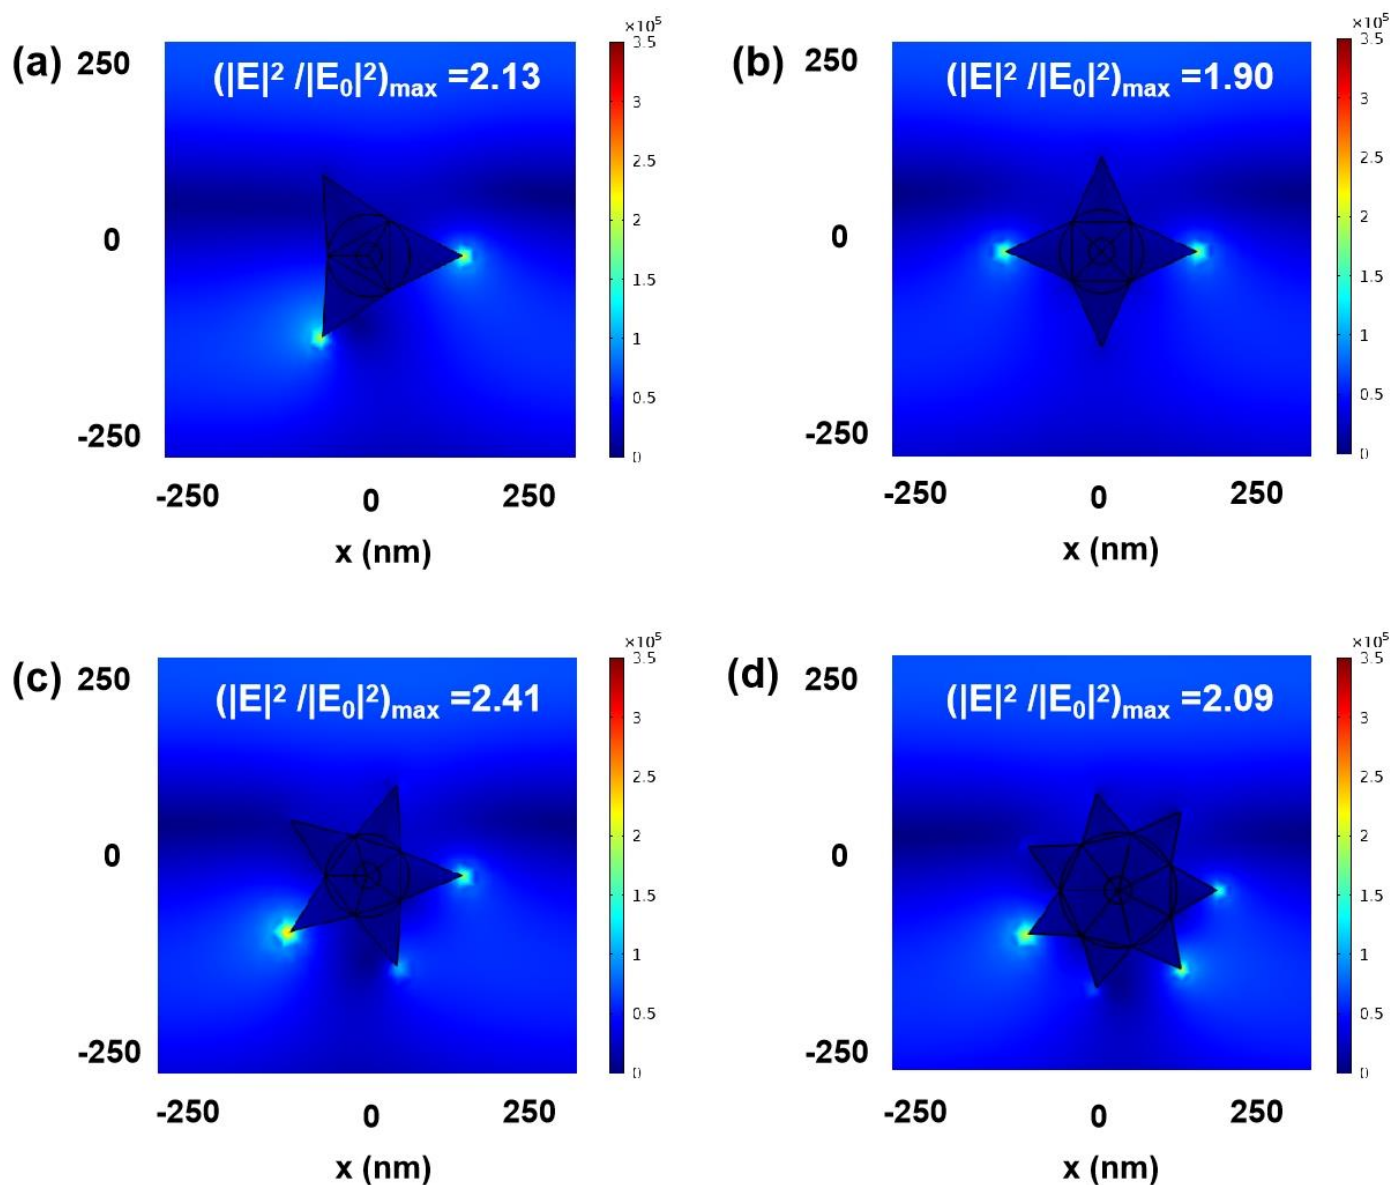

Figure S4. FDTD simulation of nanostars with different branch numbers (a) 3, (b) 4, (c) 5, (d) 7.

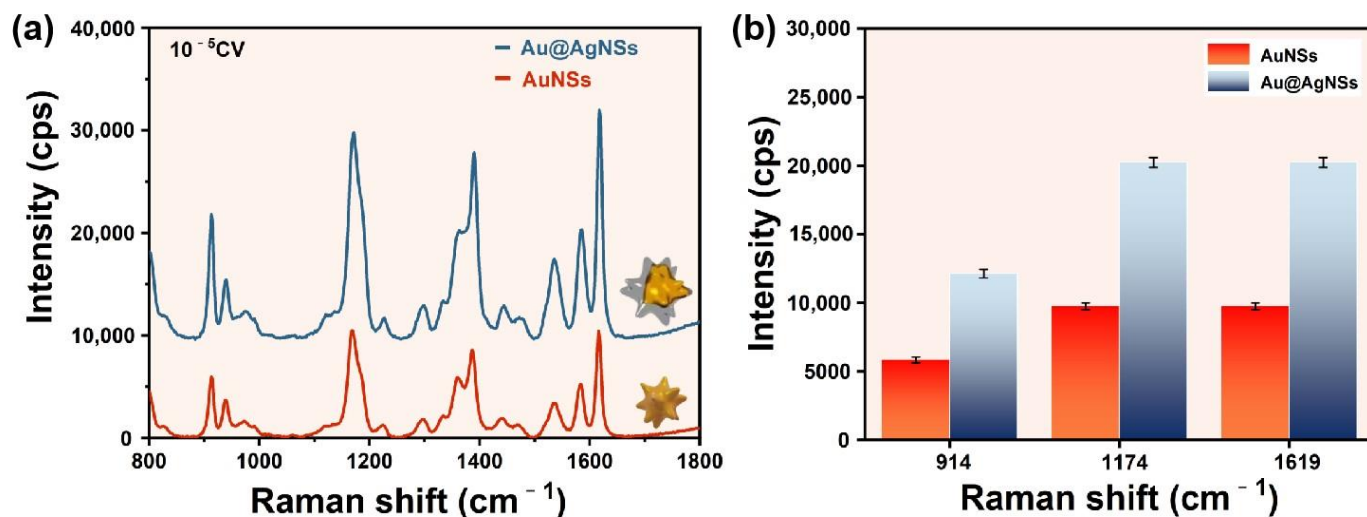

**Figure S5.** (a) The average SERS spectrum of CV ( $10^{-5}$  M) on the Au@AgNSs and AuNSs; (b) SERS intensity variation of 914  $\text{cm}^{-1}$ , 1174  $\text{cm}^{-1}$  and 1619  $\text{cm}^{-1}$  peaks.

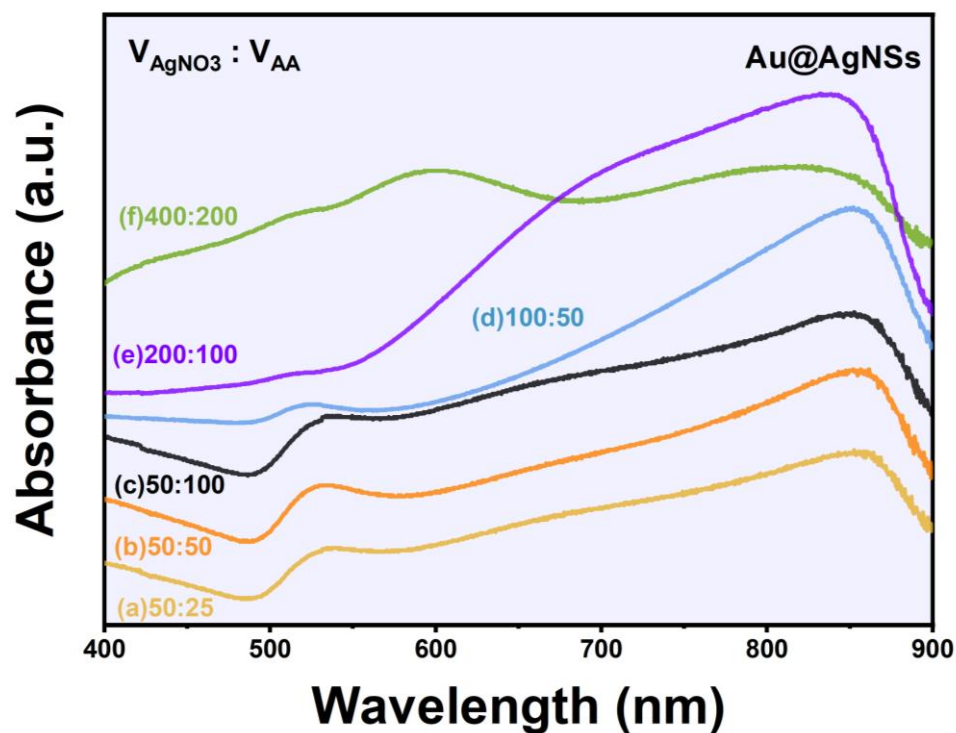

**Figure S6.** UV-vis spectra of the Au@AgNSs with different volume ratio of  $\text{AgNO}_3$  to AA: (a) 50:25, (b) 50:50, (c) 50:100; and (d) 100:50, (e) 200:100, (f) 400:200.

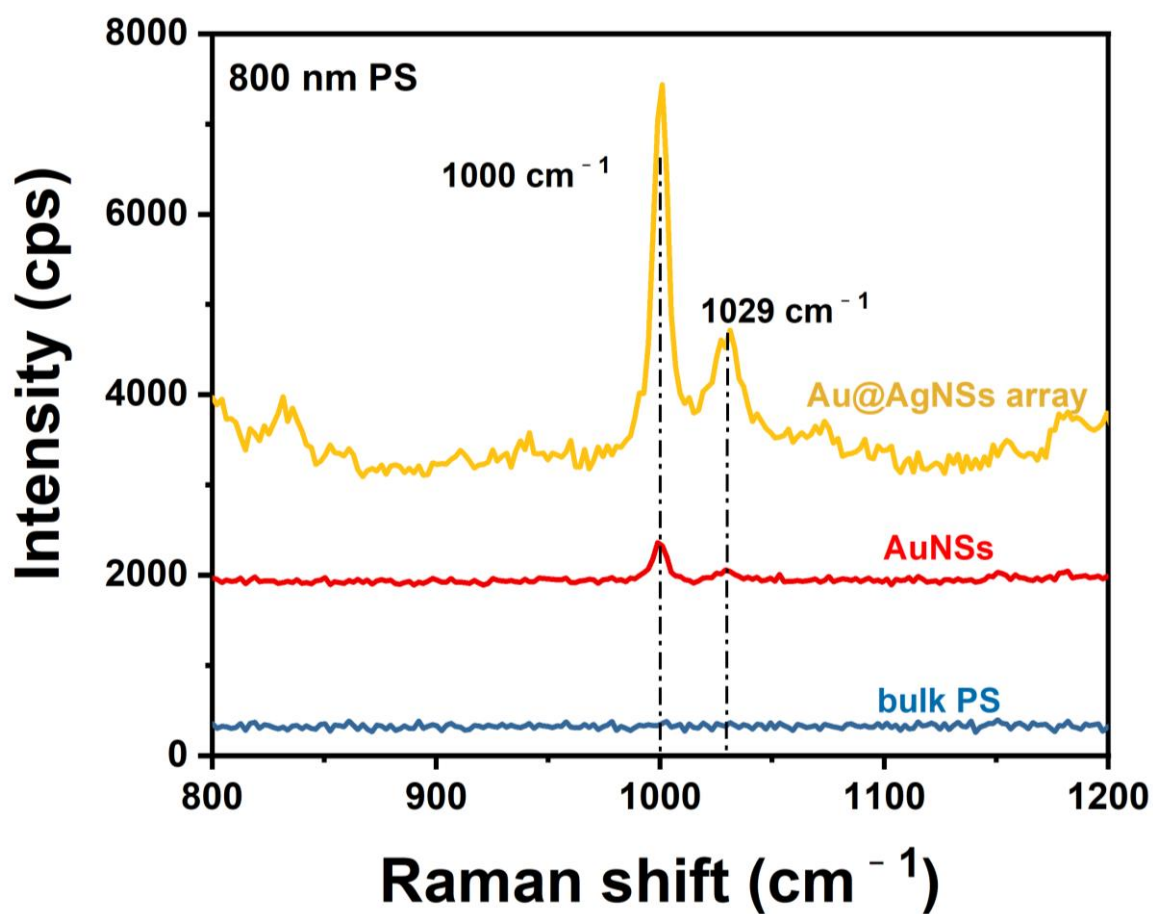

**Figure S7.** SERS spectrum of 800 nm PS on different substrates, (a) Au@AgNSs array, (b) AuNSs, (c) bulk PS.

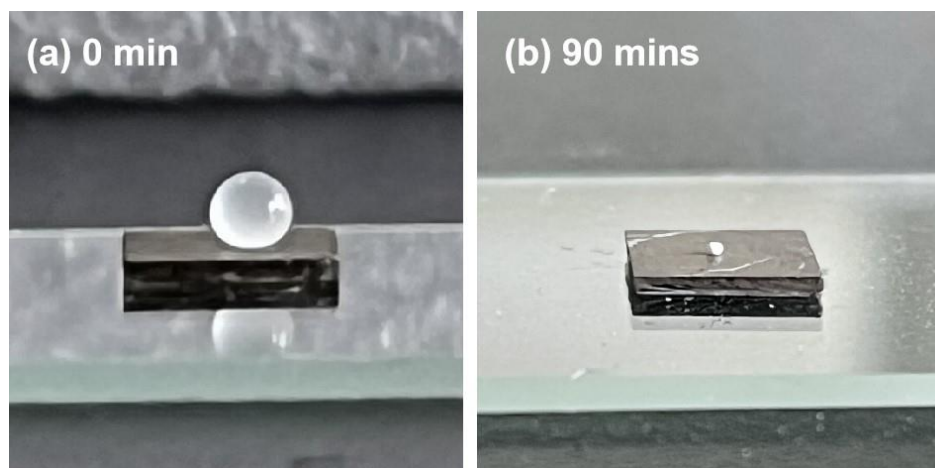

**Figure S8.** Change of PS solution with time (a) 0 min, (b) 90 min.

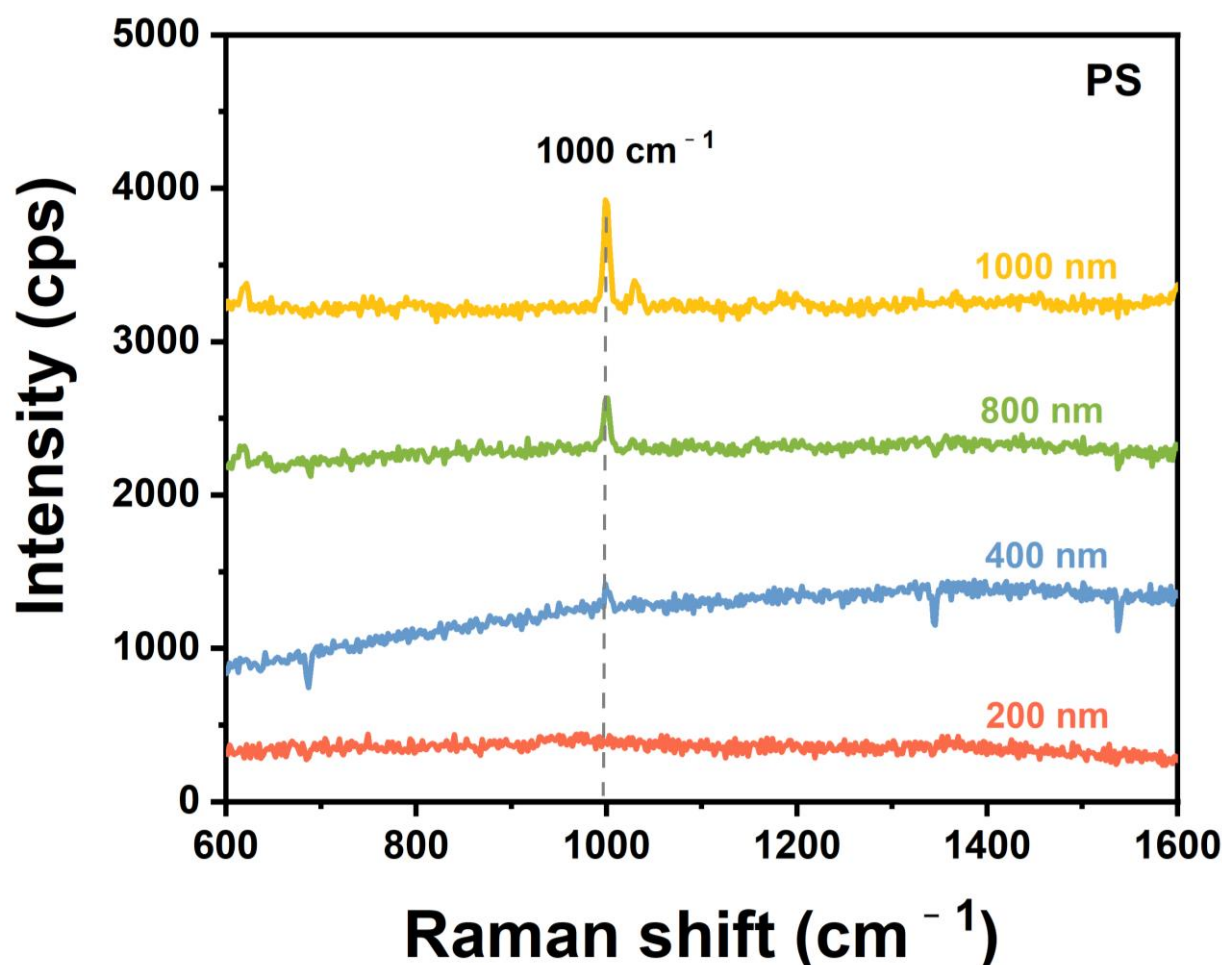

**Figure S9.** SERS spectra of PS standard solution (2.5 mg/mL) with different particle size on the silicon substrate.

#### Calculation of SERS Enhancement Factor (EF)

To quantify the enhancement contribution from Au@AgNSs arrays substrates, we calculated its enhancement factor (EF) based on the following formula:

$$EF = \frac{I_{SERS}}{I_{BULK}} \times \frac{N_{BULK}}{N_{SERS}} \quad (1)$$

where  $I_{SERS}$  and  $I_{BULK}$  are the integrated intensities of SERS signals and the normal Raman of the analyte solution at characteristic peaks  $1174 \text{ cm}^{-1}$  (Figure S10), respectively.  $N_{SERS}$  and  $N_{BULK}$  denote the numbers of corresponding CV molecules effectively excited by a laser beam in SERS measurement and normal Raman measurement, respectively. According to the above formula, the EF for the Au@AgNSs arrays substrate is calculated to be  $3.80 \times 10^7$ .

$$N_{BULK} = (\text{Laser spot area} / \text{Diffusion area}) \times (N_A \times \text{Volume}_{BULK} \times \text{Concentration}_{BULK})$$

$$N_{SERS} = (\text{Laser spot area} / \text{Substrate area}) \times (N_A \times \text{Volume}_{SERS} \times \text{Concentration}_{SERS})$$

Diffusion area =  $\pi(d/2)^2 = 0.5027 \text{ cm}^2$ , which means that a drop of  $10^{-1}$  CV (200  $\mu\text{L}$ ) is spread on a slide on the glass.

Substrate area =  $0.25 \text{ cm}^2$ , which means that the substrate deposited on a fixed size of silicon ( $0.5 \text{ cm} \times 0.5 \text{ cm}$ )

Volume<sub>BULK</sub> = Volume<sub>SERS</sub>, in order to simplified calculation.

Concentration<sub>BULK</sub> =  $10^7 \times$  Concentration<sub>SERS</sub>, according to Figure.S10(a).

$$N_{\text{BULK}}/N_{\text{SERS}} = (0.25/0.5027) \times 10^7 = 5 \times 10^6$$

I = intensity of the  $1174 \text{ cm}^{-1}$  peak

$$I_{\text{BULK}} = 46957.42$$

$I_{\text{SERS, Au@AgNSs array}} = 35734.03$ , according to Figure.S10(a).

$$EF = (I_{\text{SERS}}/I_{\text{BULK}}) \times (N_{\text{BULK}}/N_{\text{SERS}}) = 3.80 \times 10^7$$

$I_{\text{SERS, Au@AgNSs}} = 974.27401$ , according to Figure.S10(b).

$$EF = (I_{\text{SERS}}/I_{\text{BULK}}) \times (N_{\text{BULK}}/N_{\text{SERS}}) = 1.04 \times 10^5$$

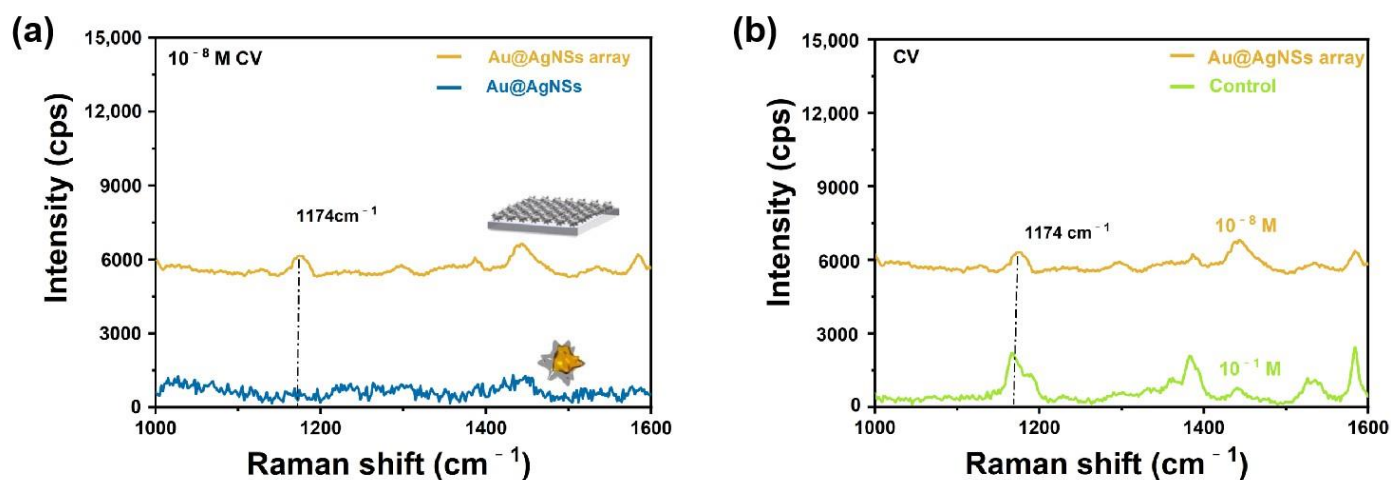

**Figure S10.** (a,b) SERS spectra used to calculate EF. The spectrum labelled as "control" is the normal Raman spectrum of CV ( $10^{-1}$  M) spread on the glass.
